# Supplementary material for: Tertiary lymphoid structures associated with enhanced anti-tumor immunity and favorable prognosis in cervical squamous carcinoma
Source: publisher site journal article supplement (doi:10.18632/aging.205733), 2024-04-17
Supplement: Supplementary file [file aging-v16i8-205733-supplementary-material-SD2.pdf]

## SUPPLEMENTARY TABLE

**Supplementary Table 1. The information of published datasets used in the study.**

| <b>Dataset</b> | <b>Cancer type</b> | <b>Number of samples</b> | <b>Platform</b> |
|----------------|--------------------|--------------------------|-----------------|
| TCGA-CESC      | CESC               | 292                      | RNA-seq         |
| GSE44001       | CESC               | 300                      | RNA-seq         |
| GSE194040      | BRCA               | 69                       | RNA-seq         |
| PRJEB23709     | Melanoma           | 73                       | RNA-seq         |
| GSE171894      | CESC               | 4                        | scRNA-seq       |
| GSE168652      | CESC               | 1                        | scRNA-seq       |
